# Supplementary material for: New Trends in E-Commerce Research: Linking Social Commerce and Sharing Commerce: A Systematic Literature Review
Source: MDPI journal article supplement (doi:10.3390/su142316024), 2022-11-30
Supplement: s1 [file s1]

Archive with 1 entries (1 files):
- sustainability-1971174-supplementary.pdf
